# Supplementary material
Source: HighWire-hosted journal article supplement (doi:10.1101/rna.071118.119)
Supplement: Supplemental_Figure_Legends.docx [file Supplemental_Figure_Legends.docx]

**Supplemental Figure 1. Sequence and structure alignments of *E. coli* L13 and human L13a.** (a) CLUSTAL O(1.2.4) sequence alignment; (b) Structure alignment of *E. coli* L13 (red) and human L13a (blue) depicted as ribbon diagrams based on the X-ray structure of the *E. coli* ribosome at 3.1Å (Protein Data Bank code 4v7u) and the CryoEM structure of the human ribosome at 3.6Å resolution (Protein Data Bank code 5T2C). The eukaryote-specific L13a C-terminal extension is shown in sky blue. *E. coli* His60 and human Arg68 residues previously shown to be important for ribosome incorporation are indicated. Structure alignment was done using Swiss-Pdb Viewer V4.1.0 iterative magic fit subroutine.

**Supplemental Figure 2. Inputs of L13a variants in the total lysates before ribosome fractionation.** Ten g of the total protein before ribosome fractionation from the lysates prepared from cells transfected with HA-tagged L13a variants were resolved by SDS-PAGE and subjected to immunoblot analysis using anti-HA antibody.

**Supplemental Figure 3. (a) Quantification of the translational inhibition of Luc-GAIT cRNA by recombinant L13a and its variants using in vitro translation reaction.** Quantification was performedby measuring the ratio of the band intensities of thenewly translated[35S]-labeled luciferase protein and T7 gene 10 protein (used as an internal control) using NIH image 64 software. Each bar diagram is the representative of an experiment performed in triplicate. Standard deviations were shown. Percent inhibition was determined by comparing the experimental lanes to the control lane with no added L13a. (b) All L13a variants used in (a) after Ni-NTA column purification were shown.

**Supplemental Figure 4.** **Structural alignment of human L13a and yeast L16A.** Human L13a (blue) and yeast L16A (red) depicted as ribbon diagrams based on the CryoEM structure of the human ribosome at 3.6Å resolution (Protein Data Bank code 5T2C) and X-Ray structure of the yeast ribosome at 3.0Å resolution (Protein Data Bank code 4V88).

**Supplemental Figure 5. CLUSTAL O(1.2.4) alignments of amino acid sequences of uL13 ribosomal proteins.** The UniProt Knowledgebase (UniProtKB) entries RL13A_CAEE (*Caenorhabditis elegans*), RL16A_YEAST (*Saccharomyces cerevisiae*), RL16B_YEAST (*Saccharomyces cerevisiae*), RL13A_PICMA (*Picea mariana*), RL13A_DROME (*Drosophila melanogaster*), RL13A_MOUSE (*Mus musculus*), RL13A_HUMAN (*Homo sapiens*) and RL13A_BOVINE (*Bos taurus*) were used. Conserved Arg 68 and the triads Lys159-Arg160-Lys161 and Arg169-Lys170-Lys171 are boxed.

**Supplemental Figure 6. Ribosomal location and molecular environment of the human L13a and yeast L16A proteins.** CryoEM structure of the human ribosome at 3.6Å resolution (Protein Data Bank code 5T2C) and and X-Ray structure of the yeast ribosome at 3.0Å resolution (Protein Data Bank code 4V88) were used. **a** - ribosomal location of the human L13a (RNA is omitted). **b** - ribosomal location of the human L13a; RNA is shown in grey (and as Van der Waals radii). **c** - ribosomal location of the yeast L16A (RNA is omitted). **d** - ribosomal location of the yeast L16A; RNA is shown in light green (and as Van der Waals radii). L13a/L16A are shown as ribbon diagrams and are in blue, with the eukaryote-specific C-terminal extension facing the solvent. The Van der Waals radii of the conserved Arg68 is shown in yellow and the conserved Lys159, Arg160 and Lys161 are in red. Ribbon diagrams of other ribosomal proteins are shown in green.

**Supplemental Figure 7. Proposed model for phosphorylation-induced conformational transition of the L13a C-terminal helix.** Ser77 of human L13a is located in the vicinity of negatively charged amino acid residues (Glu39 and Asp106), which in turn are surrounded by additional negatively charged residues (Glu144, Glu157 and Glu158). Therefore, the added negative charge resulting from phosphorylation of Ser77 may push the eukaryote-specific C-terminal helix extension away from the globular domain of the protein, which would expose the residues shown to be critical for GAIT element-dependent translational silencing in this study (Arg169, Lys170, Lys171). Human L13a is depicted as a ribbon diagram based on the CryoEM structure of the human ribosome at 3.6Å resolution (Protein Data Bank code 5T2C). Side chains (Van der Waals radii) of the negatively charged amino acid residues within the vicinity of Ser77 are shown in red. Ser77 is shown in blue and Arg169, Lys170, Lys171 are shown in dark grey.
