# Supplementary material
Source: HighWire-hosted journal article supplement (doi:10.1101/rna.071118.119)
Supplement: Supplemental_Table_Legends.docx [file Supplemental_Table_Legends.docx]

**Supplemental Table 1.** Tabular summary of the results obtained from all L13a variants. The consequences of all mutations in L13a on ribosomal incorporation, nuclear and nucleolar translocation are shown. + and – indicate presence and absence respectively. N.D. represents “not done”.
